# Supplementary material for: Diffeomorphic Registration With Intensity Transformation and Missing Data: Application to 3D Digital Pathology of Alzheimer's Disease
Source: PubMed Central journal article supplement (PMC7027169; doi:10.3389/fnins.2020.00052), 2020-02-11
Supplement: Data_Sheet_1.pdf [file Data_Sheet_1.pdf]

# DIFFEOMORPHIC REGISTRATION WITH INTENSITY TRANSFORMATION AND MISSING DATA: APPLICATION TO 3D DIGITAL PATHOLOGY OF ALZHEIMER'S DISEASE

## APPENDICES

### 1 LDDMM CHAIN RULE AND AFFINE TRANSFORMATION PROOF

Equation (4a) is computed by application of the chain rule. First the derivative of  $E$  with respect to  $F_\theta(I)$ , second  $F_\theta[I(\varphi^{-1})]$  is with respect to  $I(\varphi^{-1})$ , and third  $I$  with respect to the deformation field. The first and second steps are combined as

$$\frac{\partial E}{\partial [I(\varphi^{-1})]} = \frac{1}{\sigma^2} (F_\theta[I(\varphi^{-1})] - J) \cdot DF_\theta[I(\varphi^{-1})] \quad (8)$$

The third step is discussed in (Beg et al., 2005). Equation (4a) can be solved using a standard gradient descent approach.

The equation (4b) is the necessary condition with respect to the contrast. Since  $F_\theta$  as a polynomial it is linear in  $\theta$ , and so (4b) is a linear system solved exactly at each iteration of gradient descent.

Minimizing over both  $\theta$  and transformation parameters means the result of registration will be independent of the family of transformations indexed by  $\theta$ . An alternative approach is to minimize over  $\theta$  first, leading to an invariant cost:

$$C(I) = \min_{\theta} \frac{1}{2\sigma^2} \|F_\theta(I) - J\|_{L_2}^2.$$

Here is the proof that the affine transformation problem reduces to normalized cross correlation, which is invariant to affine transformations of the atlas image contrast.

**COROLLARY (Unknown Affine Transformations Correspond to Normalized Cross Correlation Squared).** *When  $F$  is an affine map from  $\mathbb{R} \rightarrow \mathbb{R}$ , our registration results will be invariant to affine transformations of our atlas, and (4b) can be solved analytically. For  $N = M = 1$  and  $a, b \in \mathbb{R}$ ,  $F_{a,b}(t) = at + b$ , minimizing  $\frac{1}{2\sigma^2} \|aI \circ \varphi^{-1} + b - J\|_{L_2}^2$  is equivalent to maximizing the normalized cross correlation squared of  $I \circ \varphi^{-1}$  with  $J$ .*

**PROOF.** For any fixed  $\varphi$ , optimal values of  $a, b$  can be found via a standard linear least squares estimation result, which gives  $a = \text{Cov}(I(\varphi^{-1}), J) / \text{Var}(I(\varphi^{-1}))$  and  $b = \bar{J} - a\bar{I}(\varphi^{-1})$  where  $\bar{\cdot}$  corresponds to the expected value, and expectation, variance, and covariance are taken over all voxels in the images. Plugging these into squared-error cost gives

$$\begin{aligned} & \frac{1}{2\sigma^2} \int_X \left| \frac{\text{Cov}(I(\varphi^{-1}), J)}{\text{Var}(I(\varphi^{-1}))} I(\varphi^{-1}(x)) + \bar{J} - \frac{\text{Cov}(I(\varphi^{-1}), J)}{\text{Var}(I(\varphi^{-1}))} \bar{I}(\varphi^{-1}) - J(x) \right|^2 dx \\ &= -\frac{1}{\sigma^2} |X| \frac{\text{Cov}^2(I(\varphi^{-1}), J)}{\text{Var}(I(\varphi^{-1}))} + \frac{1}{2\sigma^2} |X| \text{Var}(J) \\ &= -\frac{1}{\sigma^2} |X| \text{Var}(J) \text{NCC}^2(I(\varphi^{-1}), J) + \frac{1}{2\sigma^2} |X| \text{Var}(J) \end{aligned}$$

Up to constants that do not depend on the deformation, minimizing sum of square error with an unknown affine intensity transformation is equivalent to maximizing normalized cross correlation (NCC) squared.

## 2 PROOF THE MISSING DATA ALGORITHM IS AN EM ALGORITHM AND THEREFORE MONOTONIC IN INCOMPLETE DATA LOG-LIKELIHOOD

We discretize the images via the lattice of sites forming a disjoint partition (voxels)  $X = \cup_{i=1}^S \Delta x_i$ . Each atlas type  $a \in \mathcal{A} = \{a_1, a_2, \dots\}$  includes a deformation given by  $\varphi_a = \int_0^1 v_t^a \circ \phi_t^a dt + id$ , so the discrete values can be written as  $I_i^a = \int_{\Delta x_i} I^a \circ \varphi_a^{-1}(y) dy$ .

The observable random field  $J_i, i = 1, \dots, S$ , is conditionally Gaussian with constant variances  $\sigma_a^2$  and mean fields  $I_i^a$  determined by the atlas type  $a \in \mathcal{A}$ . In practice, we choose  $I^{a_1}$  as our atlas image, and  $I^{a_i}$  for  $i \neq 1$  to be constant images. Since they are constant, we need not optimize over the deformations  $v_t^{a_i}$  for  $i > 0$ . Augment the measured *incomplete-data*  $\mathbf{Y} = \{J_i, i = 1, 2, \dots, S\}$  with labels determining the atlas types  $A_i \in \mathcal{A} = \{a_1, a_2, \dots\}$  generating the *complete-data*  $\mathbf{X} = \{(J_i, A_i), i = 1, \dots, S\}$ . Model  $J_i$  as a Gaussian random variable with mean  $I_i^{A_i}$  and variance  $\sigma_{A_i}^2$ . The complete-data penalized log-likelihood becomes:

$$\log f(\mathbf{X}; v) = \sum_{a \in \mathcal{A}} -\frac{1}{2\sigma_a^2} \int_0^1 \int_X Av_t^a \cdot v_t^a dxdt - \frac{1}{2\sigma_a^2} \sum_{i=1}^S \delta_a(A_i) |J_i - I_i^a|^2.$$

The Kronecker-delta  $\delta_a(\cdot)$  is 1 when the argument is  $a$ , and zero otherwise. The Expectation step (E-step) replaces these functions with their expected value, a posterior probability  $\pi_a(i)$  at each voxel  $\Delta x_i$ .

**THEOREM 1.** *The Expectation Maximization algorithm is defined by the following at iteration (p):*

$$I^{a,(p)} = I^a \circ \varphi^{-1(p)}, a \in \mathcal{A},$$

*E-step:*  $E(\log f(\mathbf{X}; v) | \mathbf{Y}, v^{a,p})$

$$\pi_i^{a,(p+1)} = \frac{\frac{1}{\sqrt{2\pi\sigma_a^2}} \exp(-\frac{1}{2\sigma_a^2} |J_i - F_{\theta^{a,(p)}}(I_i^{a,(p)})|^2)}{\sum_{a' \in \mathcal{A}} \frac{1}{\sqrt{2\pi\sigma_{a'}^2}} \exp(-\frac{1}{2\sigma_{a'}^2} |J_i - F_{\theta^{a',(p)}}(I_i^{a',(p)})|^2)}, a \in \mathcal{A}; \quad (9)$$

*M-Step:*  $\arg \max E(\log f(\mathbf{X}; v) | \mathbf{Y}, v^{(p)})$

$$v^{a,(p+1)} = \arg \max_{v^a} -\frac{1}{2\sigma_a^2} \int_0^1 \int_X Av_t^a \cdot v_t^a dxdt - \frac{1}{2\sigma_a^2} \sum_i \pi_i^{a,(p+1)} |J_i - F_{\theta^{a,(p)}}(I_i^{a,(p)})|^2$$

$$\theta^{a,(p+1)} = \arg \max_{\theta^a} -\frac{1}{2\sigma_a^2} \int_0^1 \int_X Av_t^{a,(p)} \cdot v_t^{a,(p)} dxdt - \frac{1}{2\sigma_a^2} \sum_i \pi_i^{a,(p+1)} |J_i - F_{\theta^a}(I_i^{a,(p)})|^2.$$

*Iterations*  $v^{a,(p+1)}, \theta^{a,(p+1)}$  *with*  $\varphi^{a,(p+1)} = \int_0^1 v^{a,(p+1)} \circ \phi^{a,(p+1)} dt + id$  *increase in incomplete-data log-likelihood.*
